# Supplementary material for: Novel Cu2+-specific “Turn-ON” fluorescent probe based on [5]helicene with very large Stokes shift and its potential application in living cells
Source: Royal Society of Chemistry journal article supplement (doi:10.1039/c7nj05176j), 2018-01-01
Supplement: c7nj05176j1.pdf [file c7nj05176j1.pdf]

## Supplementary Information

### New Cu<sup>2+</sup>-specific “turn-on” fluorescent probe based on [5]helicene with very large Stokes shift and its potential in living cell

Nirawit Kaewnok<sup>a</sup>, Anuwut Petdum<sup>a</sup>, Jitnapa Sirirak<sup>a</sup>, Adisri Charoenpanich<sup>b</sup>, Waraporn Panchan<sup>c</sup>, Somboon Sahasithiwat<sup>c</sup>, Thanasat Sooksimuang<sup>c</sup> and Nantanit Wanichacheva<sup>\*a</sup>

<sup>a</sup>Department of Chemistry, Faculty of Science, Silpakorn University, Nakhon Pathom 73000, Thailand

<sup>b</sup>Department of Biology, Faculty of Science, Silpakorn University, Nakhon Pathom 73000, Thailand

<sup>c</sup>National Metal and Materials Technology Center (MTEC), Pathumthani, 12120, Thailand

|                                                                                       |    |
|---------------------------------------------------------------------------------------|----|
| <b>Fig. S1</b> HR-ESI MS of sensor <b>1</b>                                           | S2 |
| <b>Fig. S2</b> <sup>1</sup> H NMR spectrum of sensor <b>1</b> in CDCl <sub>3</sub>    | S2 |
| <b>Fig. S3</b> <sup>13</sup> C NMR spectrum of sensor <b>1</b> in CDCl <sub>3</sub> . | S3 |
| <b>Fig. S4</b> DEPT-135 NMR spectra of sensor <b>1</b>                                | S3 |
| <b>Fig. S5</b> The effects of pH on the fluorescence emission of <b>1</b>             | S4 |
| <b>Fig. S6</b> Negative propidium iodide stain of HepG2 cells after sensor exposure   | S4 |
| <b>Table S1.</b> Crystallographic data for sensor <b>1</b>                            | S5 |

## Mass Spectrum List Report

### Analysis Info

Analysis Name OSSUSK591108001.d  
Method Tune\_wide\_POS\_Tawatchai\_05Feb2016.m  
Sample Name M201NH  
M201NH

Acquisition Date 11/8/2016 11:54:15 AM  
Operator Administrator  
Instrument micrOTOF 72

### Acquisition Parameter

Source Type ESI  
Scan Range n/a  
Scan Begin 50 m/z  
Scan End 3000 m/z

Ion Polarity Positive  
Capillary Exit 150.0 V  
Hexapole RF 400.0 V  
Skimmer 1 70.0 V  
Hexapole 1 25.0 V

Set Corrector Fill 50 V  
Set Pulsar Pull 337 V  
Set Pulsar Push 337 V  
Set Reflector 1300 V  
Set Flight Tube 9000 V  
Set Detector TOF 2295 V

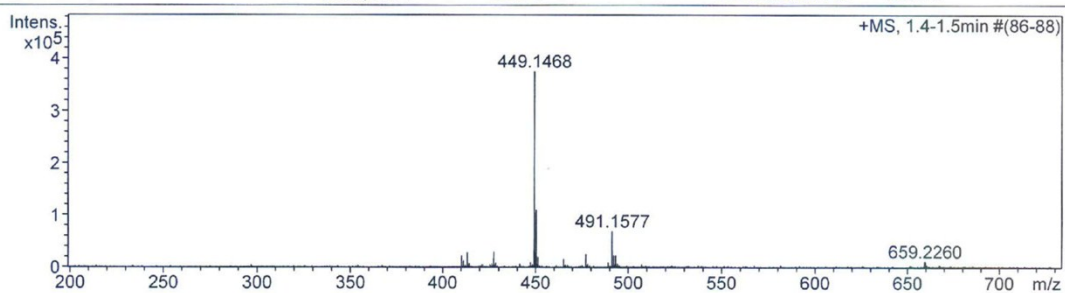

Fig. S1 HR-ESI MS of sensor 1:  $C_{26}H_{22}N_2O_4Na^+$  calcd. 449.1472 ; m/z  $[M+Na]^+$  found 449.1468.

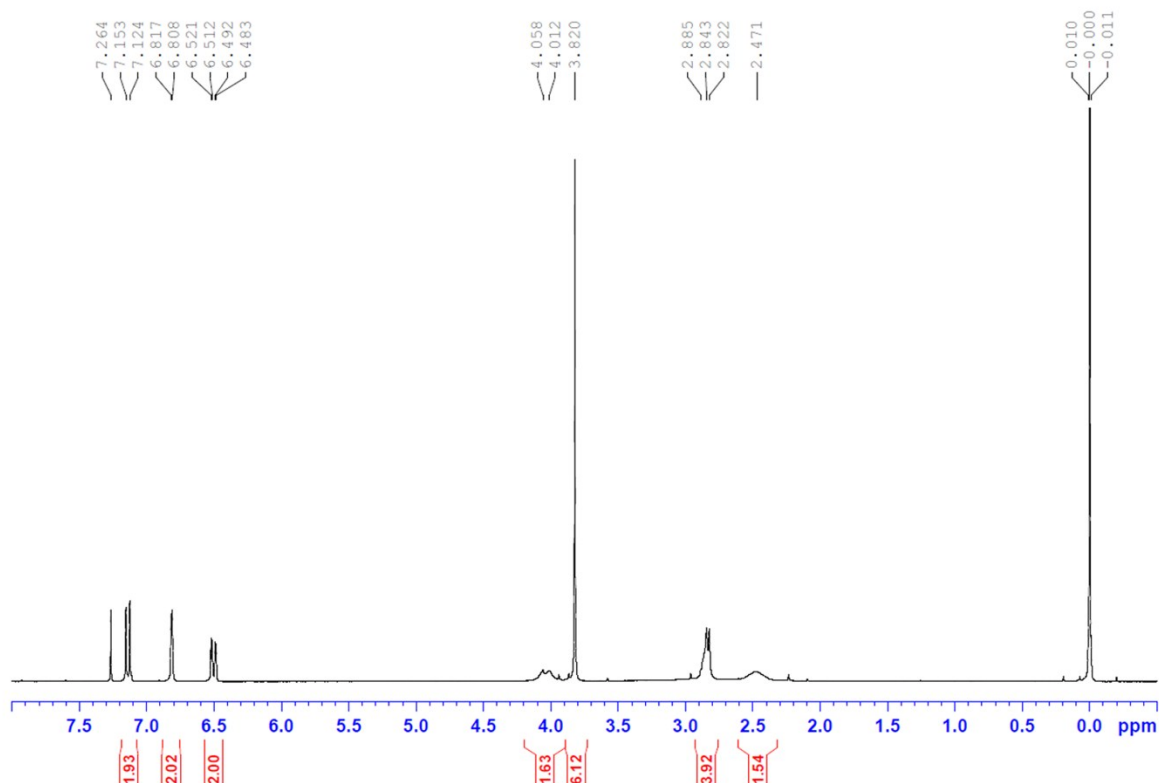

Fig. S2 <sup>1</sup>H-NMR spectrum of sensor 1 in CDCl<sub>3</sub>.

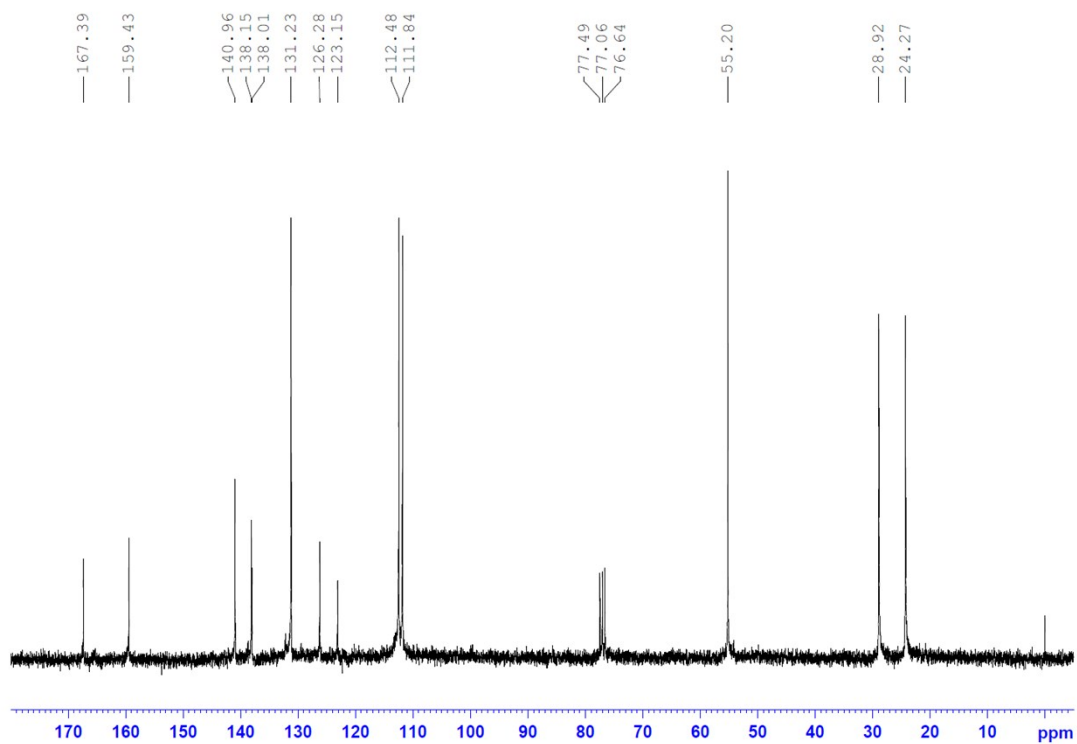

**Fig. S3**  $^{13}\text{C}$ -NMR spectrum of sensor **1** in  $\text{CDCl}_3$ .

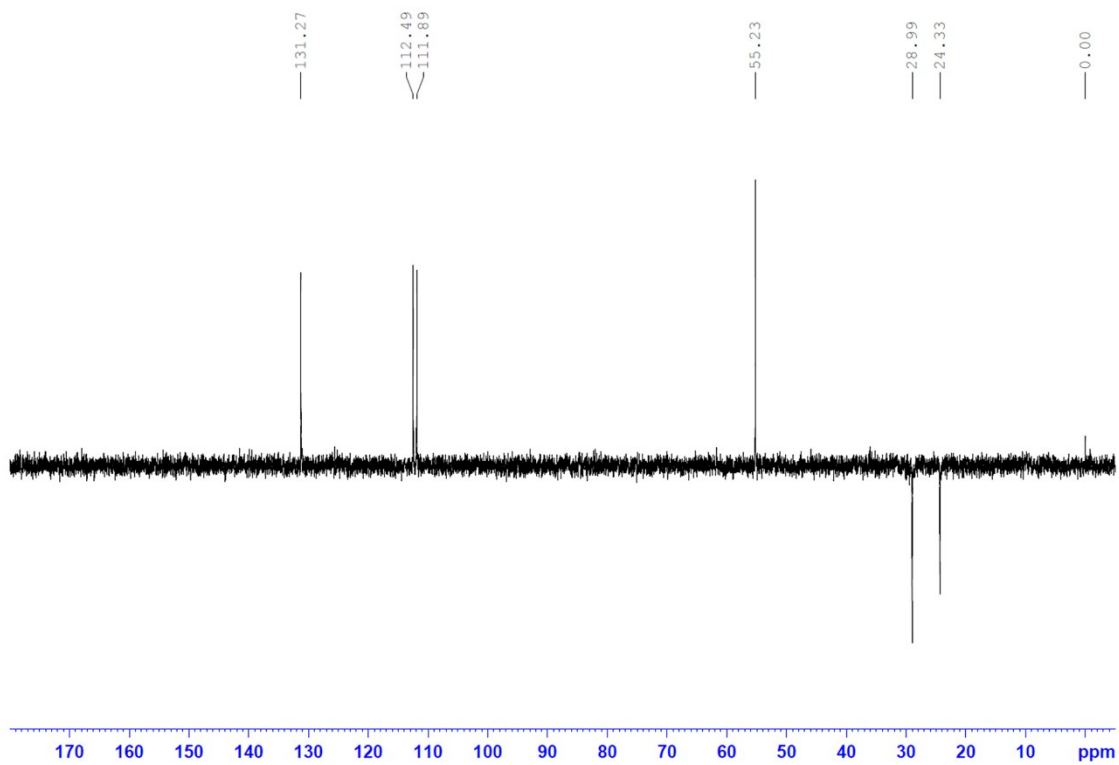

**Fig. S4** DEPT-135 NMR spectrum of sensor **1** in  $\text{CDCl}_3$  (75 MHz).

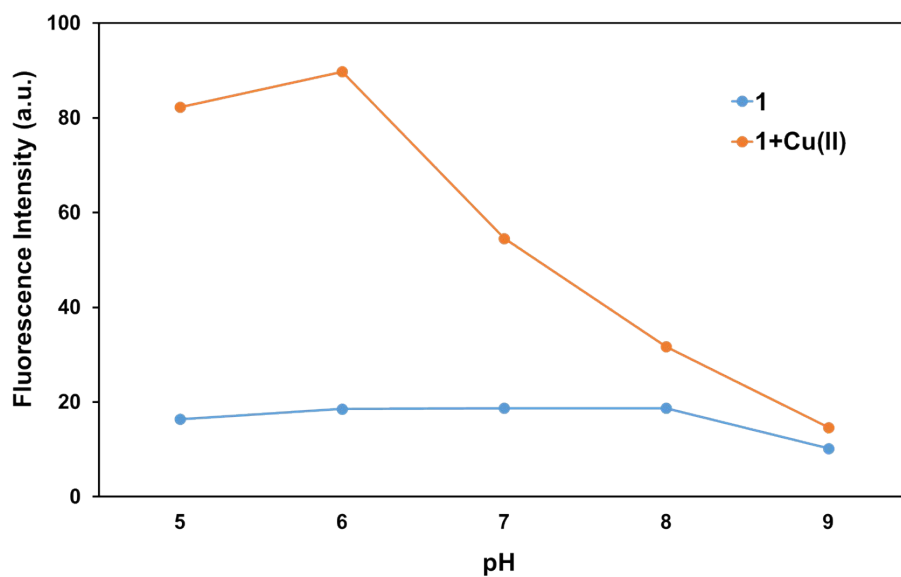

**Fig. S5** Fluorescence emissions ( $\lambda_{em}=556\text{ nm}$ ) of **1** ( $2.40\ \mu\text{M}$ ) and the emissions after addition of  $\text{Cu}^{2+}$  ( $66.7\ \mu\text{M}$ ) in HEPES buffer as function of pH ( $\lambda_{ex}=373\text{ nm}$ ).

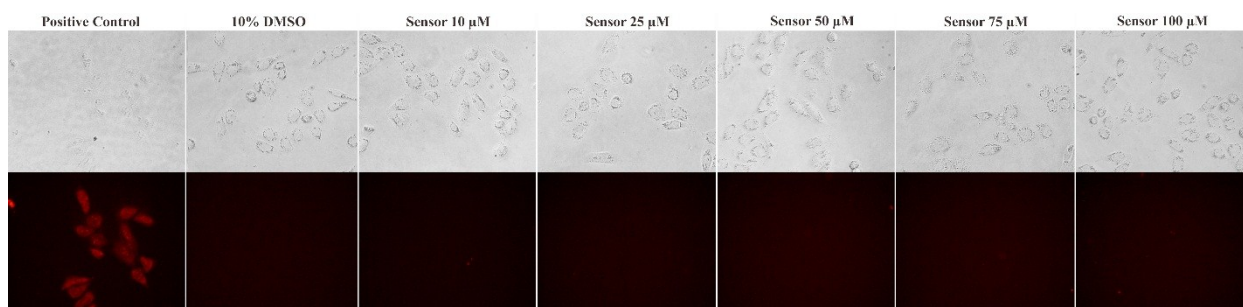

**Fig. S6** Negative propidium iodide stain of HepG2 cells after sensor exposure showed that cells were viable with plasma membrane integrity. For positive control cells were treated with 10% TritonX-100. 10% DMSO the solvent of sensor was used as negative control.

**Table S1.** Crystallographic data for sensor 1

---

|                                                               |                          |                                 |                          |
|---------------------------------------------------------------|--------------------------|---------------------------------|--------------------------|
| Bond precision:                                               | C-C = 0.0020 Å           | Wavelength=1.54178              |                          |
| Cell:                                                         | a=21.755 (4)<br>alpha=90 | b=11.303 (2)<br>beta=90         | c=16.615 (3)<br>gamma=90 |
| Temperature:                                                  | 273 K                    |                                 |                          |
|                                                               | Calculated               | Reported                        |                          |
| Volume                                                        | 4085.6 (13)              | 4085.8 (14)                     |                          |
| Space group                                                   | P b c n                  | P b c n                         |                          |
| Hall group                                                    | -P 2n 2ab                | -P 2n 2ab                       |                          |
| Moiety formula                                                | C26 H22 N2 O4            | C26 H22 N2 O4                   |                          |
| Sum formula                                                   | C26 H22 N2 O4            | C26 H22 N2 O4                   |                          |
| Mr                                                            | 426.46                   | 426.46                          |                          |
| Dx, g cm <sup>-3</sup>                                        | 1.387                    | 1.387                           |                          |
| Z                                                             | 8                        | 8                               |                          |
| Mu (mm <sup>-1</sup> )                                        | 0.766                    | 0.766                           |                          |
| F000                                                          | 1792.0                   | 1792.0                          |                          |
| F000'                                                         | 1797.56                  |                                 |                          |
| h,k,lmax                                                      | 26,13,20                 | 26,13,20                        |                          |
| Nref                                                          | 4044                     | 4010                            |                          |
| Tmin,Tmax                                                     | 0.795,0.795              | 0.656,0.754                     |                          |
| Tmin'                                                         | 0.795                    |                                 |                          |
| Correction method= # Reported T Limits: Tmin=0.656 Tmax=0.754 |                          |                                 |                          |
| AbsCorr = MULTI-SCAN                                          |                          |                                 |                          |
| Data completeness=                                            | 0.992                    | Theta(max)= 72.430              |                          |
| R(reflections)=                                               | 0.0429( 3276)            | wR2(reflections)= 0.1221( 4010) |                          |
| S =                                                           | 1.036                    | Npar= 292                       |                          |

---
